# Supplementary material
Source: Springer Nature journal article supplement (https://www.springermedizin.de/resource/supplementary/12889_2012_5429_MOESM1_ESM.pdf/9495342)
Supplement: MOESM1 [file 9495342]

Online advertisement, with link to participant information sheet and consent form

Health screen  
(smoking, height, weight, exercise, AUDIT-C)

AUDIT C = 5 OR MORE?

No

Feedback on  
weight,  
exercise,  
smoking.

No further  
data  
collection or  
contact.

YES

R

Intervention  
Feedback on weight,  
exercise, smoking and  
alcohol + link to DYD

Comparator  
Feedback on weight, exercise,  
smoking

3 month data collection  
TOT-AL, AUDIT, EQ-5D, days off sick, hospital admissions

Intervention  
Feedback on alcohol  
+ link to DYD

All staff given standard company health promotion on alcohol
